# Supplementary material
Source: PubMed Central journal article supplement (PMC4255419)
Supplement: mmc2.pdf [file mmc2.pdf]

## Article

# Cytoplasmic Dynamics Reveals Two Modes of Nucleoid-Dependent Mobility

Stella Stylianidou,<sup>1</sup> Nathan J. Kuwada,<sup>1,2</sup> and Paul A. Wiggins<sup>1,2,3,\*</sup><sup>1</sup>Department of Physics, <sup>2</sup>Department of Bioengineering, and <sup>3</sup>Department of Microbiology, University of Washington, Seattle, Washington

**ABSTRACT** It has been proposed that forces resulting from the physical exclusion of macromolecules from the bacterial nucleoid play a central role in organizing the bacterial cell, yet this proposal has not been quantitatively tested. To investigate this hypothesis, we mapped the generic motion of large protein complexes in the bacterial cytoplasm through quantitative analysis of thousands of complete cell-cycle trajectories of fluorescently tagged ectopic MS2-mRNA complexes. We find the motion of these complexes in the cytoplasm is strongly dependent on their spatial position along the long axis of the cell, and that their dynamics are consistent with a quantitative model that requires only nucleoid exclusion and membrane confinement. This analysis also reveals that the nucleoid increases the mobility of MS2-mRNA complexes, resulting in a fourfold increase in diffusion coefficients between regions of the lowest and highest nucleoid density. These data provide strong quantitative support for two modes of nucleoid action: the widely accepted mechanism of nucleoid exclusion in organizing the cell and a newly proposed mode, in which the nucleoid facilitates rapid motion throughout the cytoplasm.

## INTRODUCTION

In vivo imaging of the bacterial cell has revealed that even the simplest of organisms still display complex, cellular-scale spatial and temporal structure. For instance, genes on the bacterial nucleoid, a highly condensed circular DNA molecule, have been found to localize to sequence-specific locations with a precision of 10% of cell length (1,2). Proteins also show diverse and dynamic spatial localization patterns, from the polar localization of chemotaxis receptors (3) to the precise positioning of the cytokinetic Z-ring at midcell (4) to the cellular-scale oscillations of the *min* system (5). This cellular-scale structure is particularly striking considering that bacterial cells lack both membrane-bound organelles and cytoskeletal molecular motors, components that together play a central role in the spatio-temporal organization of the eukaryotic cell. The organizing principles of the bacterial cell, in particular the detailed mechanisms that drive cellular-scale spatial and temporal organization, are still poorly understood.

A number of groups have proposed that the nucleoid may play a central role as an organization template in the bacterial cell (6). It has long been known that aggregates of misfolded or nonfunctional proteins tend to localize at the cell poles, a process that has been implicated in cellular aging effects (7,8). But it is not entirely clear whether the complexes move under the influence of biased forces throughout the cytoplasm or undergo unbiased Brownian motion until they become trapped at the poles. Modeling studies have suggested that membrane curvature, nucleoid exclusion,

and overexpression are sufficient to cause polar localization of protein complexes (9–13), but a comprehensive quantitative experimental investigation has yet to confirm this hypothesis. Recent studies have also reported that the nucleoid plays a significant role in gene expression: mRNA-bound ribosomal subunits are excluded from the nucleoid whereas free ribosomal units are not, allowing for easy access to nascent mRNA transcripts and tight coupling between transcription and translation (14). Furthermore, it has also been proposed that entropic effects from the nucleoid may be an essential component in cellular-scale chromosome organization, in particular in the poorly understood chromosome segregation process in *Escherichia coli* (*E. coli*) (15,16).

To explicitly investigate the hypothesis that the bacterial nucleoid plays an essential role in the organization and dynamics of the cell, we set out to quantitatively map the dynamics of molecular complexes in the cytoplasm of growing *E. coli* cells. We make use of an existing green fluorescent protein (GFP)-labeled MS2-mRNA system (17) as a tracer to quantitatively map the cellular-scale, spatially dependent dynamics of the cytoplasm in thousands of complete cell cycles. The complexes are approximately twice the size of the *E. coli* ribosome and the MS2-bound messages are neither translated nor degradable, thus facilitating complete cell-cycle imaging (17). Because this system is ectopic to *E. coli*, it is believed that it is subject only to nonspecific interactions that would be general to all large complexes, including blobs of condensed chromosomal DNA, plasmids, ribosomes, and large protein aggregates.

Our measurements recapitulate the results of previous reports describing a polar-directed drift of molecular

---

Submitted August 6, 2014, and accepted for publication October 15, 2014.

\*Correspondence: [pwiggins@uw.edu](mailto:pwiggins@uw.edu)

Editor: Zemer Gitai.

© 2014 by the Biophysical Society  
0006-3495/14/12/2684/9 \$2.00

<http://dx.doi.org/10.1016/j.bpj.2014.10.030>

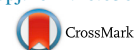

complexes and provide a new spatial map of this drift throughout the cell (18,19). Quantitative analysis of this drift closely matches the predictions of a minimal model composed of two basic physical mechanisms: nucleoid exclusion and membrane confinement. To confirm our model, we made perturbations to nucleoid structure, cellular shape, and cell physiology, and found results that reveal an unexpectedly central role for the nucleoid in determining the mobility of protein complexes in the cytoplasm. Although extensive studies have previously been performed on characterizing the dynamics of bacterial cytoplasm (17,20,21), our study is the first to quantitatively characterize the spatial dependence of the dynamics throughout the entire cell cycle, which reveals that the mobility of protein complexes is significantly larger over the nucleoid region and tends to increase when nucleoid structure is perturbed. These observations may explain many of the phenomena previously attributed to more complicated physical mechanisms.

## MATERIAL AND METHODS

### Bacterial strains

The *E. coli* strain used in this study (a gift from I. Golding) is DH5 $\alpha$ -Z1 carrying the plasmids pIG-K133 and pIG-BAC2. pIG-BAC2 is a low-copy plasmid that encodes an mRNA molecule with a 96-tandem repeat of binding sites for the RNA-binding protein MS2 under the Plac promoter. pIG-K133 contains a GFP-MS2 protein fusion under the tetracycline promoter. Note that in the absence of pIG-BAC2, no aggregation of GFP-MS2 is observed. A detailed description of this system can be found in (17).

### Growth conditions and microscopy

All strains were grown overnight from a single colony in Luria Broth (LB) media with the appropriate antibiotics (Kanamycin and Chloramphenicol). Doubling time in liquid media was  $\sim 30$  min. Overnights were diluted 1:1000 the next day into fresh media and grown to midlogarithmic phase at 30°C (OD600  $\sim 0.2$ ). The cells were then induced with Isopropyl  $\beta$ -D-1-thiogalactopyranoside (IPTG) (1 mM) and aTc (10 ng/ml) for 15 min at 30°C. Cells were rinsed and grown in fresh media for 1 hr at 30°C.

Agarose pads were prepared by pouring 1 mL of growth media with IPTG (0.25 mM) and 0.2% agarose into 2  $\times$  2 cm wells cut into a rubber gasket sealed onto a standard microscope slide. 2  $\mu$ L of cells were spotted onto dried pads and a cover slip was placed on top of the pad. The entire slide was sealed with VALP (1:1:1 vaseline, lanolin, paraffin). Under imaging conditions, the average doubling time for cells was 46 min.

For biological perturbations: *Rifampicin treatment*: agarose pads were treated with 100  $\mu$ g/ml Rif and cells were inoculated on the pad for 30 min before imaging. *A22*: cells were grown in LB and 10  $\mu$ g/ml A22 for 2 hr and then spotted on agarose pad with the same concentration of A22. *Novobiocin*: cells were spotted on agarose pads with 1000  $\mu$ g/ml of novobiocin and inoculated on the pad for 30 min before imaging. *Sodium azide*: cells were grown in sodium azide (0.01%) and 2-Deoxy-D-glucose (1 mM) for 30 min before being spotted on a pad with the same concentrations. *UV radiation*: cells on the pad were exposed to high intensity UV light ( $\lambda = 254$  nm) for 2 s and then left to grow for 1 hr before imaging.

For the visualization of the chromosome, cells were fixed in 1 ml of 70% ethanol and 30% phosphate buffered solution (PBS) for 3 min, rinsed twice in PBS, and then resuspended in 1  $\mu$ g/ml of 4',6-diamidino-2-phenylindole (DAPI).

Time-lapse phase-contrast and wide-field fluorescence microscopy images were collected with a large-format sCMOS camera (Andor Neo, Belfast, Northern Ireland) at 1 min intervals using NIS-Elements software connected to a Nikon-TiE (Nikon, Tokyo, Japan) inverted microscope outfitted with an environmental chamber.

### Image analysis

Cells were identified and linked from frame to frame using automated custom MATLAB (Mathworks, Natick, MA) segmentation software (22). The MS2-GFP foci were tracked in each frame and linked to form trajectories. For analysis, we included only cells in which both birth and division were observed, precluding filamentous and nongrowing cells.

## RESULTS

### Complete cell-cycle imaging of MS2-mRNA dynamics

To quantitatively characterize MS2-mRNA dynamics throughout the cell cycle, we captured thousands of complete cell cycles: cells in which both birth and division are explicitly observed. We analyzed 6655 complete cell cycles with at least one MS2-mRNA trajectory (Fig. 1). For image analysis, the coordinate system in cells was oriented along the major and minor axes of the cell with the origin at cell-center. Because we combine trajectories from cells with significant cell-to-cell variation in length, it is convenient to express the long-axis positions as a fraction of total cell length, which we refer to as relative position. Finally, because we capture the entire cell cycle, we can also orient our coordinate system by the old and new cell pole (the cell pole that originated from the previous division event), where we define the center of the cell as 0, the old pole as 0.5, and the new pole as -0.5 in relative cell-length units.

It has been previously noted that MS2-mRNA complexes tend to be produced at the 1/4 or 3/4 positions of the cell and then migrate to the poles asymmetrically, with a strong bias toward the old pole of the cell (23). We also observe that most of the MS2-mRNA molecules (76%) are indeed located less than 0.2 cell length away from the poles during the entire cell cycle, with a majority of those (70%) located near the old cell pole. We also find a smaller amount (10%) of MS2-mRNA within  $\pm 0.1$  cell length from the center of the cell, with the occupancy distribution shifting from a single peak early in the cell cycle into two centrally located peaks late in the cell cycle before division (Fig. 2 A).

### MS2-mRNA motion is dominated by cell growth

A fundamental unanswered question related to intracellular motion in growing cells is whether cytoplasmic factors tend to maintain their absolute position in the cell (in relation to some cellular landmark) or their relative position as a function of cell length, e.g., quarter-cell. We tested the two models: complexes execute stochastic motion about their (1) *absolute* or (2) *relative* position in the cell. In the

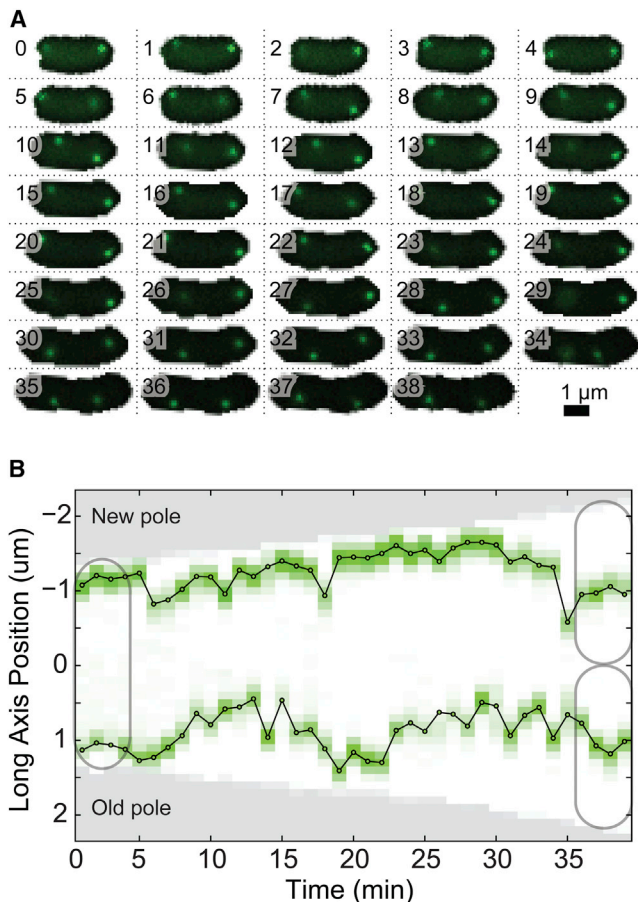

FIGURE 1 (A) Wide-field fluorescence images showing the dynamics of MS2-mRNA complexes in a typical cell throughout the entire cell cycle. Frame numbers are measured in minutes. (B) Kymograph of MS2-mRNA cell-cycle trajectory plotted along the long axis of the cell shows dynamic localization of protein complexes throughout the cell cycle. To see this figure in color, go online.

absolute motion model, we measure the positions and displacements of the MS2-mRNA complexes at all times from the center of the cell. In the relative velocity model, factors that maintain their relative position in the cell from frame-to-frame, e.g., stay at quarter-cell, are defined to have zero displacement. To calculate this relative velocity, we subtract from the absolute velocity a correction term proportional to the rate of cell growth:

$$v(t) \equiv \tilde{v}(t) - \frac{\tilde{x}(t)}{L(t)} \frac{dL}{dt}, \quad (1)$$

where  $\tilde{v}(t)$  is the absolute velocity,  $\tilde{x}(t)$  is the initial position of the displacement vector, and  $L(t)$  is the length of the cell.

To compare the two models, we computed the mean squared displacement (MSD) for the two models of motion. The MSD is defined as follows:

$$MSD(t) \equiv \langle \Delta x^2(t) \rangle, \quad (2)$$

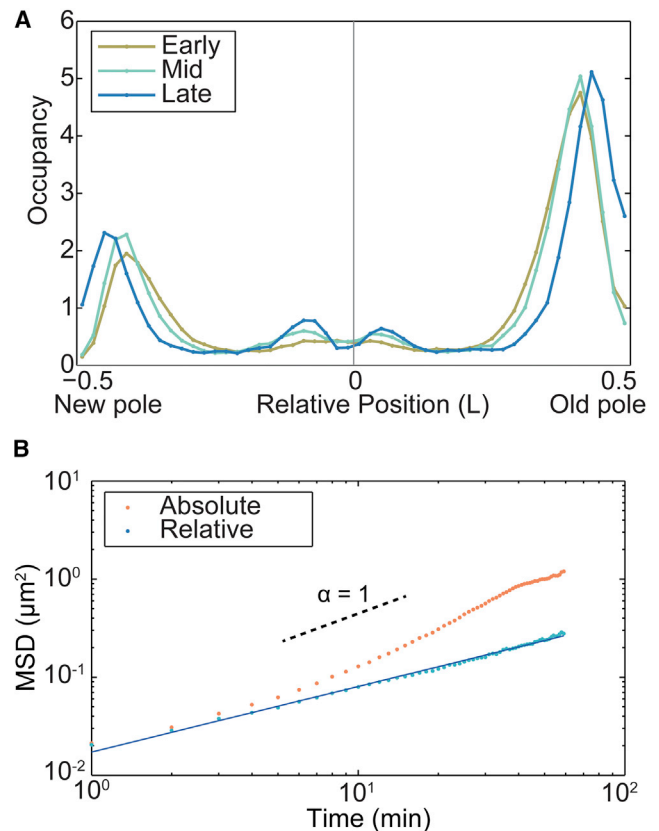

FIGURE 2 (A) Normalized histogram of the position of MS2-mRNA complexes in relative length units ( $N = 282,860$ ). Because of cell-to-cell variation in doubling time, cell cycles were partitioned into thirds: early, mid, and late. 76% of the molecular complexes are localized near the poles of the cell. (B) MSD analysis of MS2-mRNA motion. The MSD is computed using two velocity models: absolute (orange) and relative (blue). The relative model MSD has a constant slope with a scaling parameter  $\alpha = 0.66$ , consistent with previous measurements, whereas the absolute model increases in slope because of cell growth at times greater than 10 min ( $N = 8053$  trajectories). To see this figure in color, go online.

where the  $\Delta x(t)$  is the long-axis displacement over time  $t$  in either the absolute or relative coordinates, and the averaging is performed over time and distinct trajectories. The model that minimizes the MSD as a function of time minimizes the bias in the motion and is therefore the best model for the motion. The two model are expected to be equal on short times but divergent on timescales over which the bias in the motion is significant in comparison with stochastic motion. (See Supporting Material for a more detailed explanation.)

The MSD plots for the two velocity models are shown in Fig. 2 B for observation times up to 70 min, two decades longer than previously reported for this system. As expected, the MSD measurements are consistent at short times for both models; but at times greater than 10 min, the slope of the absolute velocity model significantly increases, and consequently the MSD for the absolute model is nearly an order of magnitude greater than the relative velocity model for times on the order of the cell cycle. If we were to use

absolute velocities in the analysis of cell-cycle length trajectories, our results would be completely dominated by the apparent motion of complexes moving to maintain their relative position in the cell. Therefore, in all subsequent analysis we use the relative velocity model.

For the relative velocity model, the MSD is well fit at all times by the following power-law:

$$MSD \propto t^\alpha, \quad (3)$$

with a scaling parameter  $\alpha = 0.66 \pm 0.01$ . This value of the scaling parameter has been previously reported for shorter timescales using the absolute velocity model. Our observations remain consistent with these previous measurements because the discrepancy in MSD scaling between absolute and relative models is only observable at timescales much longer than previous experiments explored. The observed MSD scaling parameter leads to a broad class of dynamics called subdiffusion ( $\alpha < 1$ ). Weber et al. (19) attributed this observation to the viscoelastic nature of the cytoplasm, in which a characteristic feature of viscoelasticity is anticorrelation of sequential steps in particle trajectories, which we also observe in our trajectories, further supporting the use of the relative velocity model (Fig. S1 in the Supporting Material).

### Step-size distribution has exponential tails

Although we observe a subdiffusive MSD, we also observe rare but relatively large displacements of complexes, e.g., from midcell to the cell pole in a few minutes. These events, which have also been recently observed in the motion of the nucleoid (24), suggest variability in the mobility beyond the expected statistical variability of subdiffusive motion. To quantitatively characterize these rare events, we compute the step-size distribution (frame-to-frame displacements) shown in Fig. 3. Note that for clarity the data shown in

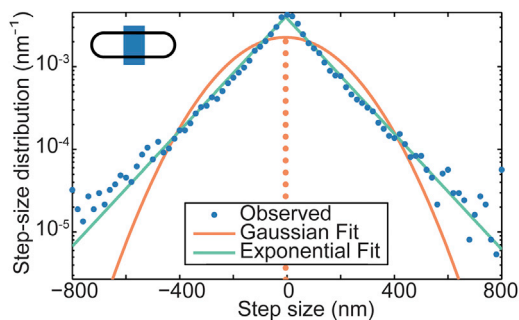

FIGURE 3 Step-size distribution. The step-size distribution is shown for MS2-mRNA complexes for a 1 min lag time for complexes with an initial position in the middle fifth of the cell, as illustrated in the inset. The data (blue circles) are compared with two models for the step-size distribution: exponential (green line) and Gaussian (orange line). Both models have the same mean and variance as the experimental data. The observed step-size distribution is in excellent agreement with the exponential model ( $N = 8053$  trajectories). To see this figure in color, go online.

Fig. 3 is only for MS2-mRNA complexes found in the middle of the cell. (Additional distributions from other cellular positions are included in the Supporting Material, Fig. S2). A standard diffusive model would predict a Gaussian distribution of step sizes. Instead, we observe that the step-size distribution is well characterized by a symmetric exponential decay function:

$$p(\Delta x) \propto \exp(-|\Delta x|/\lambda), \quad (4)$$

with a decay constant  $\lambda = 125 \pm 2$  nm. Both the Gaussian and exponential fits in Fig. 3 have identical variance, but the exponential model has a higher frequency of large steps, in agreement with our qualitative observations of MS2-mRNA dynamics.

### Mapping cell-cycle and position-dependent particle motion

Fig. 3 displays the step-size distribution for MS2-mRNA complexes found at midcell, but we have trajectory information from nearly every region of the cell. To efficiently characterize the step-size distribution at different regions along the long axis of the cell, we calculate the first two moments of the distribution: we define the *drift velocity* as the mean of the step-size distribution divided by the lag time (the time between successive measurements),

$$\langle v(x, t) \rangle \equiv \frac{\langle \Delta x \rangle}{\Delta t}, \quad (5)$$

and the diffusion coefficient as the variance of the step-size distribution divided by twice the lag time,

$$D(x, t) \equiv \frac{\langle (\Delta x - \langle \Delta x \rangle)^2 \rangle}{2\Delta t}, \quad (6)$$

where these definitions are consistent with the standard definitions of drift velocity and diffusion coefficient for a diffusive particle in a Newtonian fluid.

To map the dynamics of MS2-mRNA complexes in distinct regions of the cell, the long axis of the cell was split into 50 regions and the frame-to-frame displacement of each MS2-mRNA complex was binned by the starting position of each displacement vector. We then calculate the drift velocity (Eq. 5) and diffusion coefficient (Eq. 6) for each region. Because of cell-to-cell variation in doubling time, to investigate cell-cycle-dependent dynamics we split the cell cycle in three relative time phases (early, mid, late), and calculated the drift velocity and diffusion coefficient map for each time phase individually.

Fig. 4 A shows an annotated drift velocity map, i.e., the drift velocity as a function of position along the long axis of the cell, averaged over the entire cell cycle for a lag time  $\Delta t = 1$  min. To interpret the velocity map, we identify velocity locations along the long axis of the cell where the drift velocity is zero. If the slope of the velocity map is negative

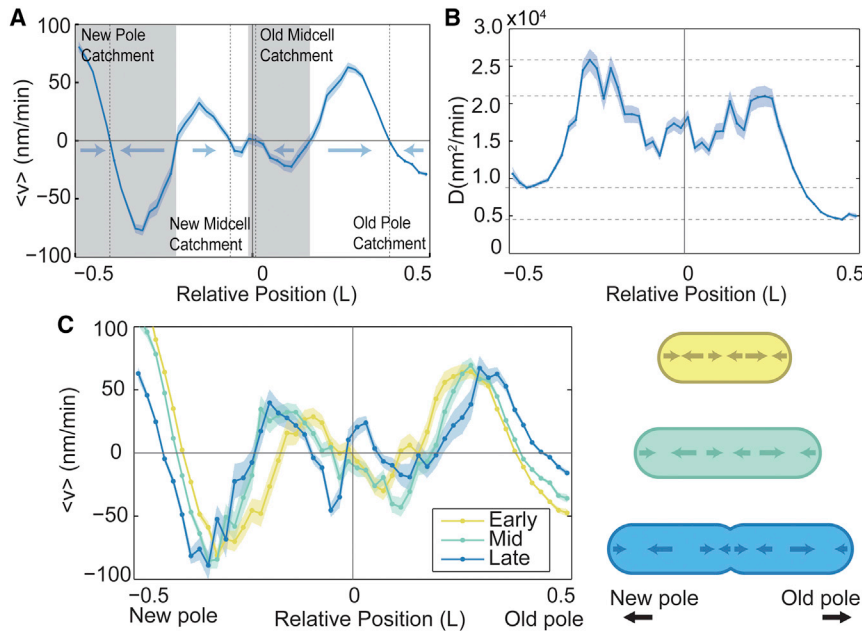

**FIGURE 4** (A) Annotated map of drift velocity averaged over the cell cycle, with stable points (dashed lines) and catchment regions (gray and white regions) annotated. (B) Map of diffusion coefficient along the long axis of the cell averaged over the cell cycle. The highest mobility occurs over regions occupied by the nucleoid ( $\pm 0.25$  cell lengths). The lowest mobility is observed at the old pole. (C) The drift velocity map shown for three relative cell-cycle times (early, mid, late) displays weak cell-cycle dependence. During the last third of the cell cycle, the velocity map is qualitatively changed at midcell, where the centrally located stable point divides into two stable points before division. (For all,  $N = 8053$  trajectories.) To see this figure in color, go online.

at the zero crossing, the position corresponds to a stable point (dashed line). If the slope of the velocity map is positive at the zero crossing, the position corresponds to a saddle point dividing two catchment regions, corresponding to regions in the cell from which a MS2-mRNA complex would move toward a stable point (in the absence of diffusive motion).

Fig. 4 B shows the diffusion coefficient of MS2-mRNA complexes as a function of position along the long axis of the cell. Rather than being constant throughout the cell, we observe a large variability in the diffusion coefficient as a function of long-axis position in the cell. The most striking feature of Fig. 4 B is that the diffusion coefficient is highest at the cell-quarters, corresponding to the location of the nucleoid. The lowest mobility is at the old pole, where the diffusion coefficient is roughly half the value ( $4900 \text{ nm}^2/\text{min}$ ) than at the new pole ( $9500 \text{ nm}^2/\text{min}$ ).

Fig. 4 C shows the drift velocity map for the three relative phases of the cell cycle. For the first two-thirds of the cell cycle (early and mid) there are three stable points, corresponding to the cell poles and midcell. The stable points at the old and new pole correspond to the high-occupancy regions adjacent to the cell poles the occupancy of the stable region at midcell is much lower (see Fig. 2 A). During the last third of the cell cycle (late), the central stable point splits into two stronger stable points, which will become the new cell poles of the daughter cells after division. Because the overall cell-cycle dependence of the drift velocity map is generally weak, we ignore the cell-cycle dependence in most of the analysis that follows.

Finally, to test whether or not it is appropriate to interpret the observed data by a steady-state drift-diffusion model, we calculated whether or not the observed occupancy, drift

velocities, and diffusion coefficients satisfied Fick's Law for zero net flux:

$$j(x, t) = -D(x, t)\nabla n(x, t) + \langle v(x, t) \rangle n(x, t) = 0, \quad (7)$$

where  $j$  is the flux and  $n$  is the number density of the MS2-mRNA complexes. Using Eq. 7, we can infer the drift velocity required to equilibrate the observed MS2-mRNA occupancy and compare this inferred drift velocity with the observed drift velocity. As shown in the Supporting Material, there is excellent agreement between these velocities, supporting the use of drift-diffusion model.

### Quantitative model of nucleoid-exclusion and membrane confinement

To quantitatively test the proposed role of nucleoid-exclusion in generating the observed drift velocities found in Fig. 4, we construct a minimal statistical mechanics model of nucleoid exclusion. The model is derived and discussed in detail in the Supporting Material. Briefly, we treat the cytoplasm as a lattice where nucleoid DNA and MS2-mRNA cannot occupy the same site and then estimate the free energy cost from the excluded volume of the nucleoid. The model depends on a single unitless geometric parameter,  $\Phi$ , that is fit by comparing the spatial distribution of MS2-mRNA complexes with the density of the nucleoid. The predicted velocity profile is as follows:

$$\langle v(x, t) \rangle = -\Phi V D(x, t) \nabla n_{DNA}(x, t), \quad (8)$$

where  $n_{DNA}$  is the number density of the nucleoid,  $V$  is the cell volume, and  $D$  is the measured diffusion coefficient (as a function of position and cell-cycle age). To estimate

the density of the nucleoid, we measure the mean fluorescence intensity of DAPI-stained nucleoids (Fig. 5 A). The predicted velocity profile from nucleoid exclusion is plotted in Fig. 5 B (green dotted line), which shows excellent agreement to the observed drift velocity maps throughout the long axis of the cell, although notably fails at the cell poles.

In addition to the exclusion forces generated by the nucleoid, the inner membrane of the cell also confines the motion of cytoplasmic complexes. To estimate the effect of membrane confinement of MS2-mRNA complexes at the cell poles (where our nucleoid exclusion model fails), we model the dynamics of protein complexes near the cell poles as diffusive particles near a hard wall. The solution to this problem is worked out in detail in the [Supporting Material](#). Briefly, we calculate a theoretical step-size distribution by solving the diffusion equation with a hard-wall boundary condition using the method of images, which provides the following exact solution for the drift velocity:

$$\langle v(\delta, \Delta t) \rangle = \frac{1}{\Delta t} \exp\left(-\frac{\delta^2}{4D\Delta t}\right) - \frac{\delta}{\Delta t} \left(1 - \operatorname{erf}\left(\frac{\delta}{\sqrt{4D\Delta t}}\right)\right), \quad (9)$$

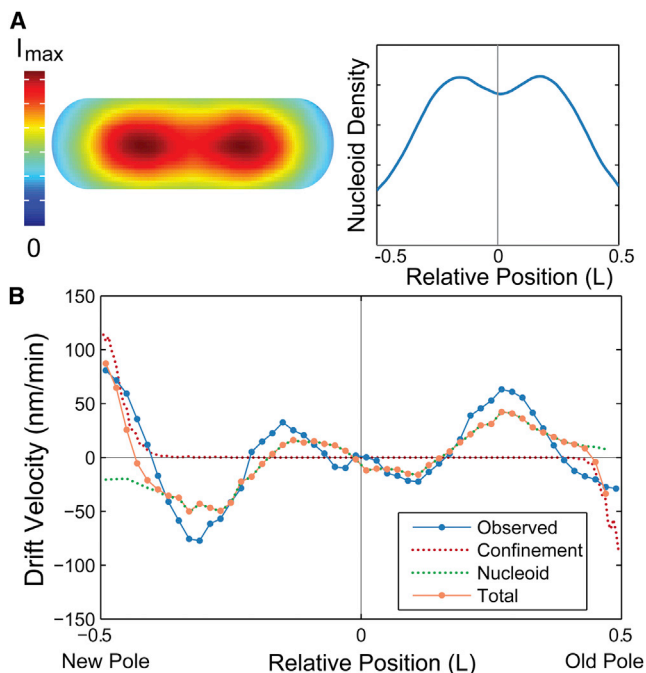

FIGURE 5 (A) At the left, nucleoid density in the cell. Cell-cycle and cell-to-cell mean interpolated fluorescent image of DAPI stained nucleoids ( $N = 369$ ). At the right, nucleoid density as the sum of intensity of DAPI-stained nucleoids over the minor axis of the cell for relative positions along the major axis of the cell. (B) Comparison between predicted and measured velocity profiles. Measured velocity profile (blue) and predicted velocity profiles because of confinement at the poles from the inner membrane (red dotted) and nucleoid exclusion (green dotted) versus relative cell position. The combination of the two predicted velocity profiles (orange) is in excellent agreement with the measured profile. To see this figure in color, go online.

where  $\delta$  is the distance from the cell pole and  $\Delta t$  is the lag time in the velocity measurement. Note that this makes a fit-parameter-free prediction of the drift velocity at the poles of the cell solely because of membrane confinement. The predicted velocity profile from Eq. 9 is shown in Fig. 5 B (red dotted line), which shows excellent agreement with the observed drift velocity map near the cell poles.

If we combine the predicted drift velocity maps for the nucleoid exclusion and membrane confinement models, we see striking agreement with the qualitative shape and quantitative scale of the observed drift velocity map throughout the entire cell, indicating that both contributions are required to accurately model cytoplasmic dynamics. More parameters can be included in the model to recapitulate subtle features of the velocity map, for instance, the observed cell-cycle velocity map (Fig. 4 C) contains the late cell-cycle splitting of the midcell stable-point, consistent with an outward force at midcell because of the closing septum, which can be reproduced (Fig. S3 B). But in the interest of isolating the most general aspects of cytoplasmic dynamics, for the rest of the analysis we focus on the contributions from nucleoid exclusion and polar confinement.

### Perturbations of nucleoid structure, cell geometry and physiology affect drift velocities and diffusion coefficients

To further investigate the role of the nucleoid in determining the mobility of complexes in the cell, we perturb cell physiology using a variety of small-molecule inhibitors. To identify changes to the MS2-mRNA motion we consider perturbations to the diffusion coefficient and changes to the nucleoid-induced exclusion. Based on previous work, we expect reductions in the metabolic activity through ATP-depletion would reduce the diffusion coefficient without significantly effecting nucleoid structure (21,25), whereas treatments that alter cell shape or the structure of the nucleoid would affect the nucleoid-exclusion-induced forcing.

For each perturbation, we again map the drift velocity and diffusion coefficient of MS2-mRNA complexes along the long axis of the cell. As Eq. 8 shows, because the predicted drift velocity distribution from nucleoid exclusion depends on both the spatially varying diffusion coefficient and the shape of the nucleoid, it is convenient to introduce the following *forcing ratio*, defined as the ratio of drift velocity to the diffusion coefficient:

$$f(x, t) \equiv \frac{\langle v(x, t) \rangle}{D(x, t)} \sim \nabla n_{DNA}(x, t), \quad (10)$$

to isolate contributions from nucleoid structure.

It has been reported that metabolic activity (21) and ATP-hydrolysis (24) increase the mobility of complexes in vivo.

To investigate the role of ATP-hydrolysis, we treated the cells with the ATP-synthesis inhibitor sodium azide. As previously reported, the mean diffusion coefficient is significantly reduced, consistent with ATP-hydrolysis playing a role in the dynamics of molecular complexes in the cytoplasm (25). But because the forcing ratio is not significantly affected by ATP-depletion (Fig. S5 A), we conclude that because ATP-driven processes do not significantly affect nucleoid structure on the timescale of the cell cycle, they do not significantly contribute to nucleoid-exclusion-driven forcing.

To further test the hypothesis that nucleoid exclusion is a key contributor to the observed drift velocity map, we first perform a nonperturbative test: The small molecule A22 inhibits the activity of MreB, an essential protein involved in cell-wall synthesis (26). Without a proper cell wall, cells treated with A22 lose their rod-like shape and become more spherical and the nucleoid appears to be more diffusely localized throughout the cell (Fig. S4). The forcing ratio for cells treated with A22 is shown in Fig. 6 A. Under these conditions, the spheroid cells were still capable of undergoing division, therefore for analysis we define the long axis of the cell to be perpendicular to the division plane. Strikingly, the qualitative shape of the forcing ratio curve for A22 treated cells is nearly opposite that of untreated cells, supporting the hypothesis that nucleoid exclusion (specifically the overall shape and density of the nucleoid) is a key component of the dynamics of molecular complexes in the cytoplasm.

The A22 treatment leads to large-scale changes in cellular structure. To more specifically test our hypothesis, we also attempt a more subtle perturbation to the shape and density profile of the nucleoid: we treat the cells with novobiocin, an antibiotic that inhibits DNA-gyrase activity and leads to DNA damage. Extended treatment with novobiocin leads to significant condensation of the nucleoid (Fig. S4). Because the nucleoids of cells treated with novobiocin are shorter with respect to the long axis of the cell, we expect the positions of the peaks in the forcing ratio (located at  $\pm 0.3$  cell lengths in untreated cells) to shift inward toward midcell, matching the shrinking geometry of the nucleoid. As expected, the forcing ratio of novobiocin treated cells shows inward movement of the peak forces (Fig. 6). In addition, the stable point at midcell is lost in novobiocin treated cells, consistent with the loss of the typical bi-lobed structure of the nucleoid because of extreme condensation.

In general, with the exception of ATP-depletion, we find that most physiological perturbations to the cell, e.g., altered cell shape (A22), DNA-gyrase inhibition (novobiocin), DNA damage (UV radiation), or transcription inhibition (rifampicin), tend to increase the diffusion coefficient of the MS2-mRNA complexes without significantly affecting the qualitative shape of the drift velocity map (Figs. 6 and S5).

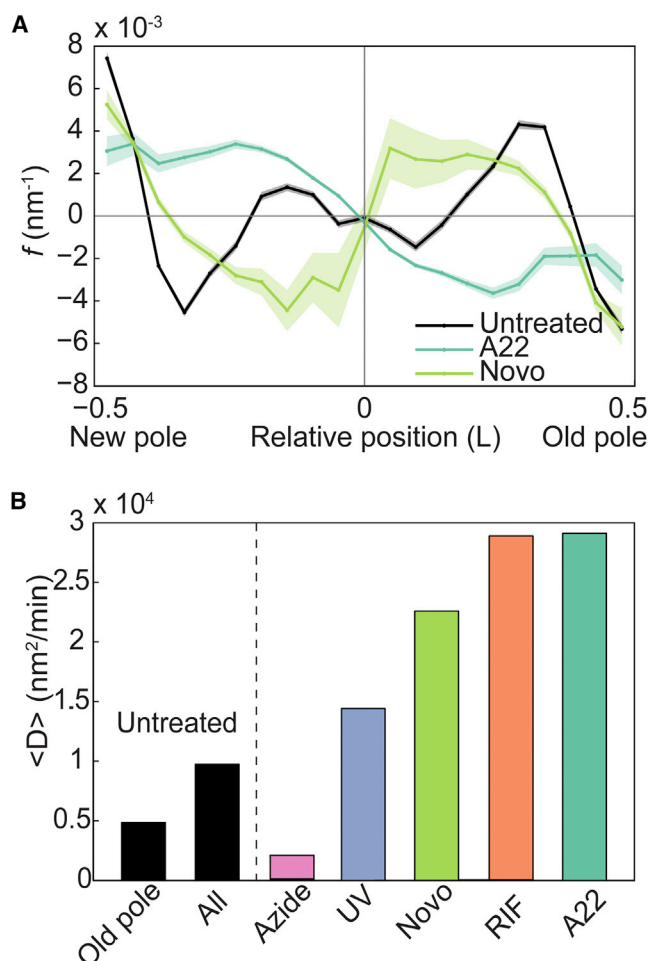

FIGURE 6 (A) Forcing ratio ( $\langle v \rangle / D$ ) versus relative position in the cell for MS2-mRNA complexes in untreated, spherical (A22) ( $N = 3207$  trajectories), and gyrase-inhibited cells (novobiocin) ( $N = 643$ ). (B) Mean diffusion coefficient of MS2-mRNA complexes at the old pole and at all positions in untreated cells, in ATP-depleted (azide) ( $N = 163$ ), DNA-damaged (UV) ( $N = 338$ ), gyrase-inhibited (novobiocin) ( $N = 643$ ), transcription-inhibited (rifampicin) ( $N = 195$ ), and spherical cells (A22) ( $N = 3207$ ). To see this figure in color, go online.

## DISCUSSION

Our results provide quantitative evidence for both the existence and relevance of forces induced by nucleoid exclusion and membrane confinement on the motion of large molecular complexes in the bacterial cell. Although nucleoid exclusion and confinement have often been invoked to explain the retention of large complexes at the poles, a detailed picture of the dynamics, including the understanding of how complexes move to the poles, has never been described from a quantitative biophysical perspective.

### Exponential step-size distribution

The observation of non-Gaussian step size for the motion of protein complexes in the bacterial cell has recently been

reported by Parry et al. as a central argument for identifying the dynamics of the bacterial cytoplasm as glass-like (21). The observation of exponential tails, and more generally non-Gaussian step-size distributions, is rather generic in biology and soft-condensed matter physics (e.g., see (27)). The exponential dependence of the step-size distribution has been explained as a consequence of standard Fickian diffusion with a wide distribution of diffusion coefficients. A number of mechanisms can result in variability in diffusion coefficients, including quenched disorder in the media or transitions between states with different mobility that have lifetimes that are comparable with the lag time of observation (27). The dynamics observed in glasses is one specific example of this more general phenomenology. In the context of the bacterial cytoplasm, it would be natural to assume both mechanisms may contribute to the long tails of the step-size distribution. For instance, we observe in this study that the diffusion coefficient of MS2-mRNA complexes varies as a function of position along the long axis of the cell. Although these effects are typically obscured by cell-to-cell variation, the step-size distribution is explicitly not affected by cell-to-cell averaging.

### Unexpectedly high mobility over regions of high nucleoid density

Classic investigations of the effects of molecular crowding on diffusive particles show that diffusion coefficients tend to decrease with increased concentration of the crowding agent (e.g., (28,29)). In our nucleoid-exclusion model (Eq. 8), we proposed that DNA crowds the MS2-mRNA complexes in the vicinity of the nucleoid, reducing both the number of local configurations overlapping the nucleoid (leading to depletion in MS2-mRNA occupancy) and frustrating diffusion by occluding neighboring sites. Therefore, the nucleoid-exclusion model would naively predict both decreased occupancy over the nucleoid as well as a decreased diffusion coefficient. Strikingly, our results show exactly the opposite phenomenology: comparison between the occupancy of MS2-mRNA (Fig. 2 A) and the position dependent diffusion coefficient (Fig. 4 B) reveals that the highest diffusion coefficients are observed in regions with the lowest MS2-mRNA occupancy and the highest nucleoid density.

One attractive hypothesis is that the nucleoid, acting as a crowding agent and depleting MS2-mRNA complexes from the central region of the cell, is also very dynamic, in part because of active processes such as transcription and replication, which can both result in large-scale rearrangements of the nucleoid. In fact, a number of lines of evidence support the central role of the nucleoid in the high MS2-mRNA mobility. For instance, the transcription inhibitor rifampicin is known to affect nucleoid structure, but its dominant effect on MS2-mRNA motion is to significantly increase the diffu-

sion coefficient. Although one might expect transcription inhibition to diminish chromosome mobility, it in fact leads to a significant *increase* in mobility (20). It has been previously shown that the effect of rifampicin treatment on the mobility of chromosomal loci depends on the length of the treatment (19). Our experimental methods are such that we measure MS2-mRNA diffusion constants on time scales that are in the regime of higher chromosomal mobility due to rifampicin treatment. A tight link between MS2-mRNA and chromosome dynamics would therefore account for the large increase in diffusion coefficient and make a key prediction: the increased mobility of MS2-mRNA complexes would be most pronounced over the nucleoid in cells treated with rifampicin. By applying our analysis to rifampicin-treated cells, we do in fact observe nearly a fourfold increase in the diffusion coefficient of MS2-mRNA complexes in regions of highest nucleoid density (Fig. S5 B).

In contrast, many large macromolecular complexes, e.g., ribosomes and protein aggregates, are known to accumulate at the cell poles. Although many processes (including translation) are active at the poles, these processes do not appear to efficiently facilitate MS2-mRNA mobility. It is possible that the presence of large complexes further frustrates the movement of the MS2-mRNA complexes (8). Consistent with this model is the observation that the diffusion coefficient of MS2-mRNA complexes at the old pole is smaller by a factor of two than the diffusion coefficient at the new pole (Fig. 4 B), since it is known that nonfunctional protein aggregates tend to accumulate at the old pole (7). But, despite the lower mobility at the old pole, there is still strong evidence of significant nonthermal contributions to the dynamics at both poles since the mobility is significantly decreased with the depletion of ATP (Fig. 6 B).

Parry et al. also proposed that cellular metabolism fluidizes a glass-like cytoplasm (21). The glass model was invoked because glass-like dynamics, such as cytoplasmic dynamics, are the result of crowding and caging-related phenomena. In particular, Parry et al. reported distinct subpopulations of protein complexes with fast and slow dynamics, in analogy to distinct subpopulations observed in glass forming-liquids (21). In a glass, rapid particle movement is the result of collective motion by neighboring particles, but there is currently no direct evidence for collective motion of this type in the bacterial cytoplasm. Our observations are consistent with the observations of Parry et al. in that we observe trajectories with a wide range of diffusion coefficients, but our spatial analysis of the diffusion coefficient as a function of position in the cell reveals that these subpopulation can be explained, at least in part, by the presence or absence of the nucleoid (Fig. S7). Since Parry et al. reported metabolism-dependent differences in mobility in DNA-free regions, we suspect the proposed metabolism-dependent mechanism must be distinct from the phenomena we report in this paper.



## CONCLUSIONS

Our observations provide strong quantitative support for two modes of nucleoid action: both for the widely accepted mechanism of nucleoid-exclusion and a newly proposed mode, facilitating rapid complex motion through the cytoplasm. These combined roles of the nucleoid in facilitating the movement of protein complexes has important biological implications and suggests that the nucleoid may play a much more active role in the organization and transport of macromolecules in the bacterial cytoplasm than previously thought.

## SUPPORTING MATERIAL

Eight figures and supporting text are available at [http://www.biophysj.org/biophysj/supplemental/S0006-3495\(14\)01112-6](http://www.biophysj.org/biophysj/supplemental/S0006-3495(14)01112-6).

The authors would like to thank I. Golding for the generous gift of strains. The authors would also like to thank H. Kim and I. Backus for early work on this project. This work was supported by the National Science Foundation under grant Nos. NSF-PHY-084845 and NSF-MCB-1151043-CAREER.

## SUPPORTING CITATIONS

Reference (30) appears in the Supporting Material.

## REFERENCES

- Viollier, P. H., M. Thanbichler, ..., L. Shapiro. 2004. Rapid and sequential movement of individual chromosomal loci to specific subcellular locations during bacterial DNA replication. *Proc. Natl. Acad. Sci. USA*. 101:9257–9262.
- Wiggins, P. A., K. C. Cheveralls, ..., J. Kondev. 2010. Strong intranucleoid interactions organize the *Escherichia coli* chromosome into a nucleoid filament. *Proc. Natl. Acad. Sci. USA*. 107:4991–4995.
- Maddock, J. R., and L. Shapiro. 1993. Polar location of the chemoreceptor complex in the *Escherichia coli* cell. *Science*. 259:1717–1723.
- Lutkenhaus, J. 2007. Assembly dynamics of the bacterial MinCDE system and spatial regulation of the Z ring. *Annu. Rev. Biochem.* 76:539–562.
- Raskin, D. M., and P. A. de Boer. 1997. The MinE ring: an FtsZ-independent cell structure required for selection of the correct division site in *E. coli*. *Cell*. 91:685–694.
- Ptacin, J. L., and L. Shapiro. 2013. Chromosome architecture is a key element of bacterial cellular organization. *Cell. Microbiol.* 15:45–52.
- Lindner, A. B., R. Madden, ..., F. Taddei. 2008. Asymmetric segregation of protein aggregates is associated with cellular aging and rejuvenation. *Proc. Natl. Acad. Sci. USA*. 105:3076–3081.
- Landgraf, D., B. Okumus, ..., J. Paulsson. 2012. Segregation of molecules at cell division reveals native protein localization. *Nat. Methods*. 9:480–482.
- Huang, K. C., R. Mukhopadhyay, and N. S. Wingreen. 2006. A curvature-mediated mechanism for localization of lipids to bacterial poles. *PLoS Comp. Bio.* 2:e151.
- Howard, M. 2004. A mechanism for polar protein localization in bacteria. *J. Mol. Biol.* 335:655–663.
- Winkler, J., A. Seybert, ..., B. Bukau. 2010. Quantitative and spatio-temporal features of protein aggregation in *Escherichia coli* and consequences on protein quality control and cellular ageing. *EMBO J.* 29:910–923.
- Saberi, S., and E. Emberly. 2010. Chromosome driven spatial patterning of proteins in bacteria. *PLoS Comp. Bio.* 6:e1000986.
- Saberi, S., and E. Emberly. 2013. Non-equilibrium polar localization of proteins in bacterial cells. *PLoS ONE*. 8:e64075.
- Sanamrad, A., F. Persson, ..., J. Elf. 2014. Single-particle tracking reveals that free ribosomal subunits are not excluded from the *Escherichia coli* nucleoid. *Proc. Natl. Acad. Sci. USA*. 111:11413–11418.
- Jun, S., and A. Wright. 2010. Entropy as the driver of chromosome segregation. *Nat. Rev. Microbiol.* 8:600–607.
- Youngren, B., H. J. Nielsen, ..., S. Austin. 2014. The multifork *Escherichia coli* chromosome is a self-duplicating and self-segregating thermodynamic ring polymer. *Genes Dev.* 28:71–84.
- Golding, I., and E. C. Cox. 2004. RNA dynamics in live *Escherichia coli* cells. *Proc. Natl. Acad. Sci. USA*. 101:11310–11315.
- Gupta, A., J. Lloyd-Price, ..., A. S. Ribeiro. 2014. In vivo kinetics of segregation and polar retention of MS2-GFP-RNA complexes in *Escherichia coli*. *Biophys. J.* 106:1928–1937.
- Weber, S. C., A. J. Spakowitz, and J. A. Theriot. 2010. Bacterial chromosomal loci move subdiffusively through a viscoelastic cytoplasm. *Phys. Rev. Lett.* 104:238102.
- Coquel, A. S., J. P. Jacob, ..., H. Berry. 2013. Localization of protein aggregation in *Escherichia coli* is governed by diffusion and nucleoid macromolecular crowding effect. *PLOS Comput. Biol.* 9:e1003038.
- Parry, B. R., I. V. Surovtsev, ..., C. Jacobs-Wagner. 2014. The bacterial cytoplasm has glass-like properties and is fluidized by metabolic activity. *Cell*. 156:183–194.
- Kuwada, N. J., K. C. Cheveralls, ..., P. A. Wiggins. 2013. Mapping the driving forces of chromosome structure and segregation in *Escherichia coli*. *Nucleic Acids Res.* 41:7370–7377.
- Lloyd-Price, J., A. Häkkinen, ..., A. S. Ribeiro. 2012. Asymmetric disposal of individual protein aggregates in *Escherichia coli*, one aggregate at a time. *J. Bacteriol.* 194:1747–1752.
- Javer, A., N. J. Kuwada, ..., M. C. Lagomarsino. 2014. Persistent super-diffusive motion of *Escherichia coli* chromosomal loci. *Nat. Comm.* 5:3854.
- Weber, S. C., A. J. Spakowitz, and J. A. Theriot. 2012. Nonthermal ATP-dependent fluctuations contribute to the in vivo motion of chromosomal loci. *Proc. Natl. Acad. Sci. USA*. 109:7338–7343.
- Gitai, Z., N. A. Dye, ..., L. Shapiro. 2005. MreB actin-mediated segregation of a specific region of a bacterial chromosome. *Cell*. 120:329–341.
- Wang, B., J. Kuo, ..., S. Granick. 2012. When Brownian diffusion is not Gaussian. *Nat. Mater.* 11:481–485.
- Phillips, R., J. Kondev, ..., H. Garcia. 2009. *Physical Biology of the Cell*. Garland Science, Taylor & Francis Group, New York, NY.
- Muramatsu, N., and A. P. Minton. 1988. Tracer diffusion of globular proteins in concentrated protein solutions. *Proc. Natl. Acad. Sci. USA*. 85:2984–2988.
- Weber, S. C., M. A. Thompson, ..., J. A. Theriot. 2012. Analytical tools to distinguish the effects of localization error, confinement, and medium elasticity on the velocity autocorrelation function. *Biophys. J.* 102:2443–2450.

**SUPPORTING FIGURES**

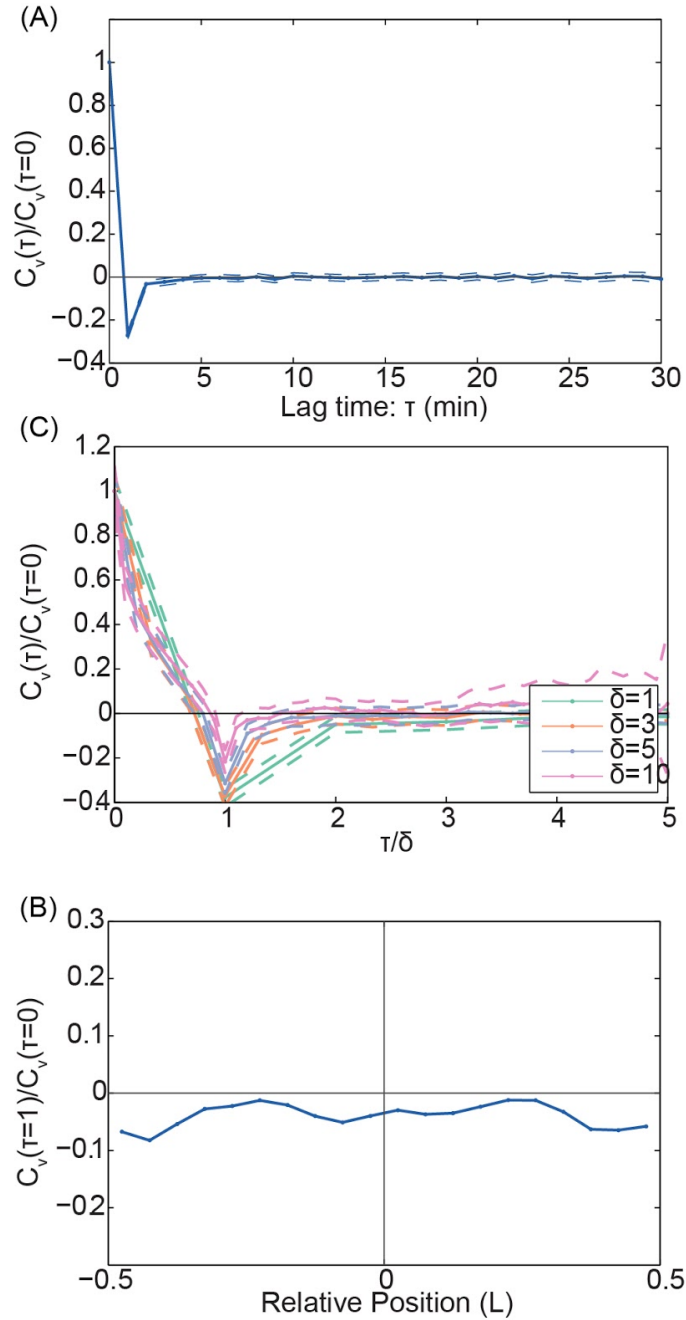

**Figure S1. (A) Velocity Autocorrelation Function.** Normalized velocity autocorrelation function defined as  $C_V(\tau) = \langle v(t) v(t + \tau) \rangle$  agrees with previous findings of the viscoelastic nature of the cytoplasm. **(B) Velocity Autocorrelation Function for**

**different velocity lag times  $\delta$ .** The autocorrelation function collapses to 0.3 at the value of  $t/\delta = 1$  for different velocity lag times, where the velocity is defined as  $v(t) = (v(t+\delta)-v(t))/\delta$ . This is in agreement with what has been predicted by the fractional Langevin motion model (1). **(C) Velocity Autocorrelation Function with relative cellular position.** Normalized velocity autocorrelation function for lag time of one minute shows velocity anticorrelation for all positions in cell.

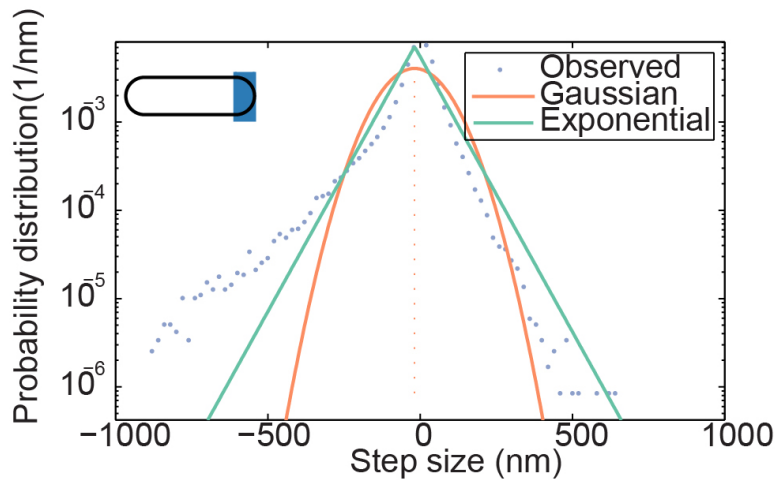

**Figure S2. Step-size distribution has exponential tails.** The step-size distribution (using the relative velocity model) is shown for MS2-mRNA complexes for a 1 minute lag time for complexes with starting position of their displacement vector near the old pole of the cell ( $1/5$  of the cell), as illustrated in the inset. The data (blue circles) are compared with two models for the step-size distribution: *Exponential* (green line) and (ii) *Gaussian* (orange line). Both models have the same mean and variance as the experimental data. The observed step-size distribution shows the best agreement with an Exponential Model with tails of different decay constants because large steps towards the pole are mitigated by membrane exclusion forces from the pole.

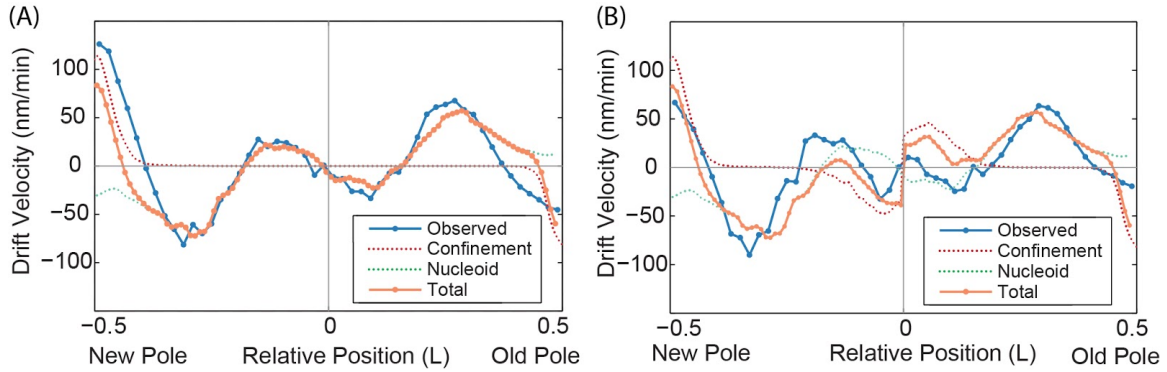

**Figure S3. Panel A: First half of the cell cycle and predicted velocity profile.** Measured velocity profile during the first half of the cell cycle (blue) and the predicted velocity profile (orange) of the combination of confinement at the poles from the inner membrane and nucleoid-exclusion versus relative cell position show excellent agreement. **Panel B: Second half of the cell cycle and predicted velocity profile.** Measured velocity profile during the last half of the cell cycle (blue) agrees with the combined predicted velocity profile (orange) of to membrane confinement at the poles, partial confinement at the middle due to septation and nucleoid-exclusion, successfully producing the split of the stable point at the middle of the cell.

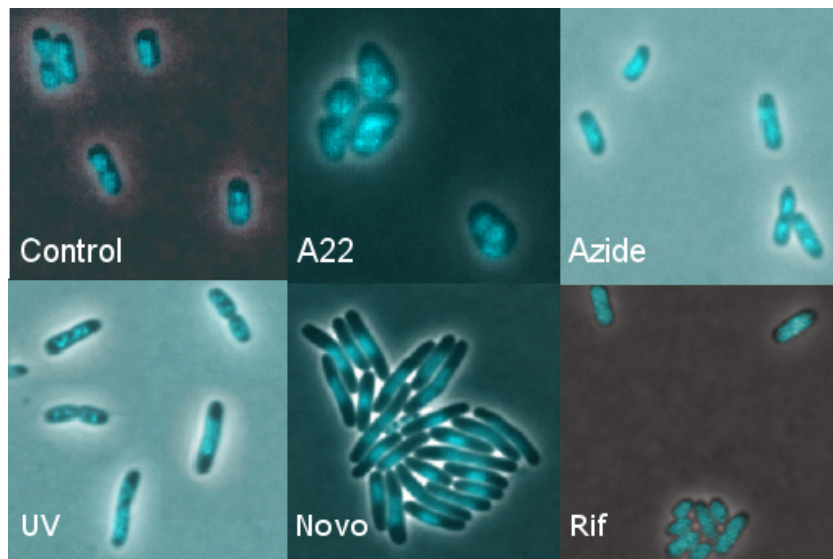

**Figure S4. Nucleoid visualization of untreated and treated cells.** Cells untreated and treated with either A22, Azide, Novobiocin, Rifampicin, and radiated with UV light and stained with DAPI for the visualization of the nucleoid. Cells treated with A22, show more diffusely localized nucleoids. Treatment with Novobiocin leads to condensation of the nucleoid. Cells radiated with Ultra Violet radiation appear to disperse the nucleoid around the cell. Rifampicin causes expansion of the nucleoid and Azide does not appear to cause a visible difference to the nucleoid's shape.

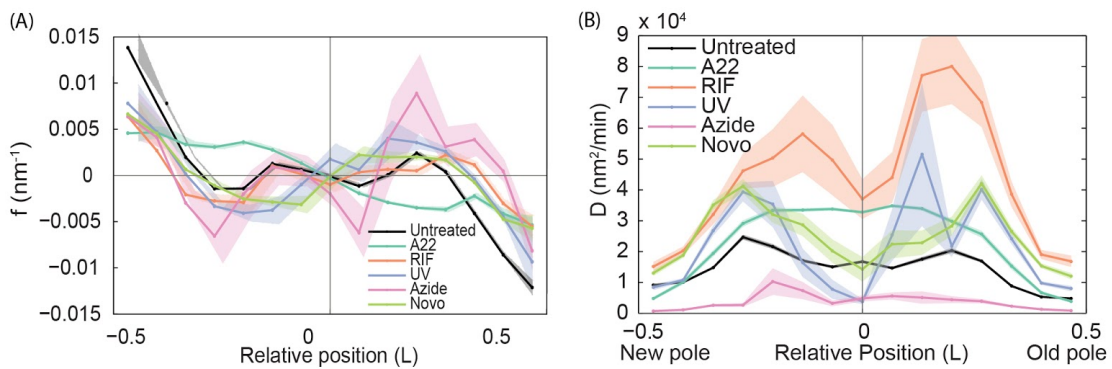

**Figure S5: Panel A: Forcing ratio of untreated and treated cells.** Forcing ratio (Drift Velocity / Diffusion Coefficient) of MS2-mRNA complexes with respect to the relative position in the cell in untreated, ATP-depleted (Azide), DNA-damaged (UV), gyrase inhibited (Novobiocin), transcription inhibited (Rifampicin) and spherical cells (A22). Inhibiting ATP hydrolysis and metabolic activity does not affect the shape of the forcing ratio curve. **Panel B: Spatial Dependence of diffusion coefficient of untreated and treated cells.** Diffusion Coefficient of MS2-mRNA complexes with respect to the relative position in the cell in untreated, ATP-depleted (Azide), DNA-damaged (UV), gyrase inhibited (Novobiocin), transcription inhibited (Rifampicin) and spherical cells (A22). Inhibiting ATP hydrolysis and metabolic activity decreases the complexes mobility whereas in all other cases the diffusion coefficient dramatically increased. The highest diffusion coefficient appears to be in the nucleoid occupied regions, especially at  $\frac{1}{4}$  cell length.

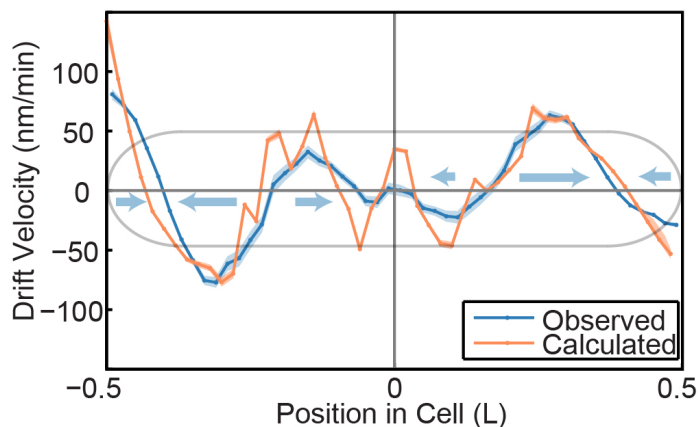

**Figure S6.** The calculated drift velocity profile using Eq. S1 assuming Fick's Law shows remarkable agreement with the observed drift velocity profile in the cell.

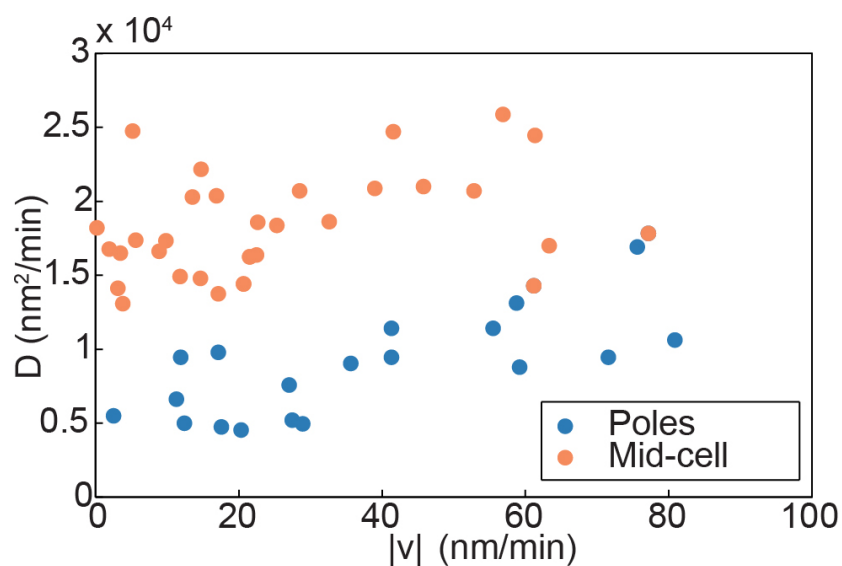

**Figure S7: Scatter plot of diffusion coefficient versus drift velocity.** The diffusion coefficient plotted against the magnitude of the drift velocity for each bin of subcellular position shows two subpopulations of particles, with fast and slow dynamics, according to their cellular position. Both regions show a similar distribution of drift velocities, but particles at the poles generally exhibit lower diffusion coefficients whereas particles at middle and quarter cell regions (Mid-cell) exhibit higher diffusion coefficients.

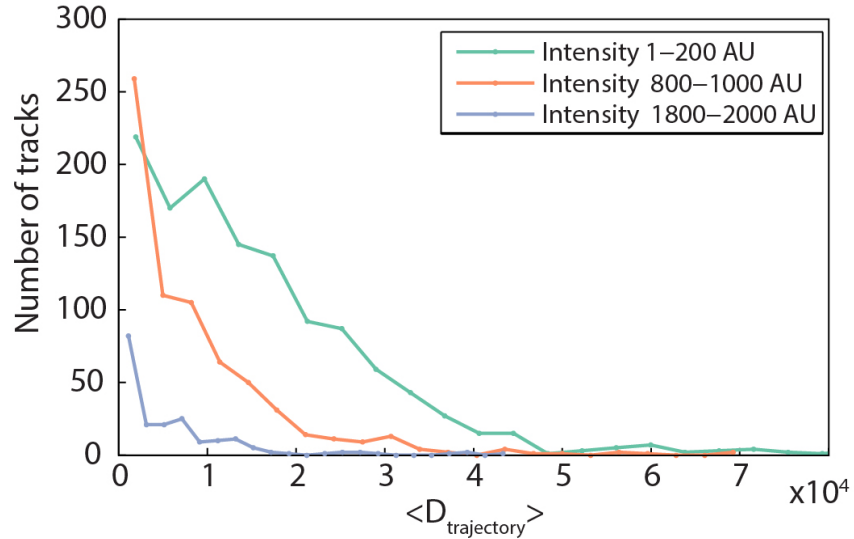

**Figure S8: Mean diffusion coefficient as a function of MS2-mRNA focus intensity.**

To investigate whether or not focus intensity is a reliable measure of particle size, we plot a histogram of mean diffusion coefficient of each MS2-mRNA trajectory for three representative ranges of MS2-mRNA intensity (lowest, mid, and highest intensity used for analysis) in the first frame of the cell cycle. Through Stoke’s Law, if intensity was proportional to particle size, we would expect the diffusion coefficient to scale inversely with the intensity of the focus. Instead, we observe a broad distribution of diffusion coefficients for all ranges of focus intensity. This is a consequence of complete cell cycle imaging and photobleaching: Because the MS2-mRNA complexes are not degraded, when they are inherited by daughter cells, they have been exposed to the lamp for varying amounts of time and thus photobleached for varying amounts of time. Therefore, in an experiment with complete cell cycle imaging, the intensity is not a reliable measurement of particle size.

## SUPPORTING TEXT

### ***S1. Agreement between observed drift velocity and drift velocity from Fick's law support that the system is in steady state***

As a test whether or not steady state statistical mechanics is an appropriate approximation for the dynamics of molecules in the cytoplasm, we calculated a theoretical drift velocity profile using Fick's Law. Under steady state conditions, the net the flux of complexes should be zero, thus

$$J = 0 = n_{mRNA} v_{drift} - D_{mRNA} \nabla n_{mRNA} \quad (S1)$$

where  $n_{mRNA}$  is the number density and  $D_{mRNA}$  is the diffusion constant of MS2-mRNA molecules, respectively. The number density was calculated from the full spatial distribution of complexes (Fig. 2A) and a spatially-dependent diffusion constant was estimated using the local mobility of complexes (Fig. 3B). The calculated drift velocity profile from Eq. S1 shows remarkable overlap with experimental data (Fig. S6), supporting the use of the Langevin approximation.

### ***S2. Derivation of the excluded volume of the nucleoid model***

The cytoplasm is modeled as a lattice where nucleoid DNA and MS2-mRNA cannot occupy the same site. We treat the nucleoid as a gas of independent blobs with local number density  $n_N$ . The relative reduction in the number of nucleoid configurations as a results of opening up volume  $\Delta V$  for a protein complex is

$$Z(\Delta V) \approx Z(0) \exp(-n_N \Delta V), \quad (S2)$$

where  $Z(0)$  is the partition function in the absence of a complex volume  $\Delta V$ . (Note that this can be understood as a consequence of the  $p dV$  term from the Helmholtz Free Energy.) Therefore, given an external number density  $n_N$ , we expect the number density of the mRNA complexes to be



$$n_{mRNA} \propto Z(\Delta V) \propto \exp(-n_N \Delta V). \quad (\text{S3})$$

For convenience, we normalize the observed DNA number density to one and we will assume the nucleoid blob density is related to the DNA density,

$$n_N = N_N n_{DNA}, \quad (\text{S4})$$

where the constant of proportionality is the number of blobs  $N_N$ . We now define a unitless exclusion fraction:

$$\Phi \equiv \frac{N_N \Delta V}{V_{cell}}, \quad (\text{S5})$$

where is the number of nucleoid blobs multiplied by the fraction of the cell volume excluded by the protein complex.

To understand the meaning of  $\Phi$  it is useful to re-express it in terms of the total volume excluded by the crowding agent (DNA). We rewrite the volume of the ms2 complex ( $\Delta V$ ) in terms of the volume of an individual crowding agent  $\delta V$  where

$$\Delta V = r \delta V, \quad (\text{S6})$$

and  $r$  is the number of statistically independent crowding agents excluded by an ms2-mRNA complex.  $\Phi$  can then be written in terms of the total excluded volume of the nucleoid ( $V_N = N_N \delta V$ ):

$$\Phi = \frac{V_N}{V_{cell}} r, \quad (\text{S7})$$

where  $\Phi$  depends on both the fraction of volume excluded and the number of statistically independent crowding agents excluded by the ms2 complex. A closely related result is derived in more detail in Ref 27, Chapter 14 by an alternative method. We note that  $r$  depends on the structure of the nucleoid and is therefore not known a priori even though the volume excluded by the chromosome is widely believed to be roughly 10-20% of the cell (12). Therefore the unitless constant must be fit to the data.

We can now rewrite the number density of the mRNA

$$n_{mRNA}(x) \propto Z(\Delta V) \propto \exp(-\Phi V_{cell} n_{DNA}(x)), \quad (\text{S8})$$

where the model for the mRNA number density is parameterized by a single parameter, the exclusion fraction  $\Phi$ . We can use this relationship between the number density of mRNA and DNA to obtain a value for the unitless parameter  $\Phi=1.9$ . Since the factor  $r$  can be quite large (e.g. Ref 27), this value appears to be consistent with our proposed

model.

It follows that the free energy associated with the excluded volume of the chromosome regions can be approximated as

$$G = -k_b T \log Z = -k_b T \log ( \exp( -\Phi V_{cell} n_{DNA} ) ) \quad (S9)$$

We can estimate the effective external force caused by the chromosome unattainable regions to be

$$F = -\nabla G = -\Phi V_{cell} k_b T \nabla n_{DNA} \quad (S10)$$

Finally, from Fick's law the contribution of the DNA excluded volume to the drift velocity can be approximated to be

$$\langle v \rangle (x, t) = \frac{\langle F \rangle}{\gamma} = -\Phi V_{cell} D(x, t) \nabla n_{DNA}(x, t) \quad (S11)$$

### ***S3. Derivation of membrane exclusion model.***

To estimate the exclusion forces from membrane confinement at the cell poles, we treat the cell poles as hard-walls and explicitly solve the diffusion equation as a function of distance from the cell wall. Note that the solutions for each cell pole are symmetric, therefore we only show the solution for a single hard-wall but that the complete solution is a combination of the symmetric solutions. We begin by calculating the expectation value of the step-size distribution of a diffusive particle a distance  $\delta$  from the wall:

$$\langle x - \delta \rangle = \int_0^{\infty} dx (x - \delta) \rho(x, \delta) \quad (S12)$$

where  $\rho(x, \delta)$  is a probability density function. The hard-wall condition can be represented using the method of images, where the probability density function is the sum of gaussians at  $+\delta$  and  $-\delta$ :

$$\langle x - \delta \rangle = \frac{1}{\sqrt{2\sigma^2\pi_0}} \int_0^{\infty} (x - \delta) (e^{-(x-\delta)^2/2\sigma^2} + e^{-(x+\delta)^2/2\sigma^2}) dx. \quad (S13)$$

In the case of 1D-diffusive motion with diffusion constant  $D$ , the standard deviation of the gaussians are defined as  $\sigma^2 = 2D\Delta t$ , where  $\Delta t$  is the lag time between successive measurements. This integral can then be solved exactly:

$$\langle x - \delta \rangle = \sqrt{\frac{4D\Delta t}{\pi}} \exp\left(-\frac{\delta^2}{4D\Delta t}\right) - \delta \left(1 - \operatorname{erf}\left(\frac{\delta}{\sqrt{4D\Delta t}}\right)\right). \quad (S14)$$

To estimate the drift velocity profile from membrane confinement, we use the same convention that we use for experimental data and divide the step size distribution by the lag time between successive measurements:

$$\langle v \rangle = \frac{1}{\Delta t} \sqrt{\frac{4D\Delta t}{\pi}} \exp\left(-\frac{\delta^2}{4D\Delta t}\right) - \frac{\delta}{\Delta t} \left(1 - \operatorname{erf}\left(\frac{\delta}{\sqrt{4D\Delta t}}\right)\right) \quad (\text{S15})$$

#### ***Section S4. Biased diffusive motion.***

A standard approach to characterize the stochastic motion of a diffusive particle in the presence of a biasing force is to calculate the mean squared displacement (MSD),

$$MSD(t) \equiv \langle (x(t) - x(0))^2 \rangle. \quad (\text{S16})$$

In an ideal Newtonian fluid, the MSD of an object undergoing diffusive motion with a constant biasing force takes the following form:

$$MSD(t) = 2 D t + (v t)^2, \quad (\text{S17})$$

where  $D$  is the diffusion coefficient,  $v$  is the bias velocity, and  $t$  is the observation time. At short times the MSD is dominated by diffusive motion (first term) and at long times the motion is dominated by the bias velocity (second term). The bias velocity explicitly depends on the model of motion (*absolute* versus *relative*) while the diffusion coefficient is independent of the model. Because each term in Eq. 3 scales differently with time, the differences between the two velocity models are irrelevant at short times whereas at long times the models are expected to be divergent, according to their bias velocity. We therefore propose to determine which model best represents the behavior of MS2-mRNA complexes by identifying the velocity model that has the smallest MSD and therefore the smallest bias.

We can also estimate a timescale at which the bias velocity dominates over the diffusive motion by setting the two terms in Eq. S17 equal to each other. The timescale at which the bias velocity dominates the motion,  $t \sim 2D/v^2$ , for our experimental values of  $D \sim 10^4 \text{ nm}^2/\text{min}$  and  $v \sim 50 \text{ nm}/\text{min}$  is approximately 10 minutes, which is consistent with the timescale that absolute model diverges from the relative model in Fig. 2(B).

## **SUPPORTING REFERENCES**

(1) Weber, S. C., Thompson, M. A., Moerner, W. E., Spakowitz, A. J., & Theriot, J. A. (2012). Analytical tools to distinguish the effects of localization error, confinement, and medium elasticity on the velocity autocorrelation function. *Biophysical journal*, *102*(11), 2443-2450.
